# Supplementary material for: Male obesity effects on sperm and next-generation cord blood DNA methylation
Source: PLoS One. 2019 Jun 27;14(6):e0218615. doi: 10.1371/journal.pone.0218615 (PMC6597061; doi:10.1371/journal.pone.0218615)
Supplement: S1 File — shows the methylation statistics when DNA methylation is correlated with BMI without adjusting to any confounding factors. (XLS) [file pone.0218615.s002.xls]

## Sheet: No adjustment
DNA methylation correlations without adjusting for confounding factors
Gene	Sperm DNA methylation with donor's BMI	Estimate	Std.error	p.value
MEST	Donor's BMI	-0.000319568	0.000300572	0.288698
SNRPN	Donor's BMI	4.61366e-05	0.000307632	0.880902
NNAT	Donor's BMI	-0.00122474	0.00050567	0.0161355
PEG10	Donor's BMI	-0.000620643	0.00054977	0.260008
H19-IG DMR	Donor's BMI	0.00175146	0.0010543	0.0979066
IGF2 DMR0	Donor's BMI	0.00021651	0.000811977	0.789947
MEG3-IG DMR	Donor's BMI	0.00159988	0.000663853	0.0166449
HIF3A	Donor's BMI	0.00196248	0.000834809	0.0194887
Gene	FCB DNA methylation with father's BMI	estimate	std.error	p.value
MEST	Father BMI_Female child FCB methylation	0.00299485	0.00227646	0.1942
MEST	Father BMI_Male child FCB methylation	0.000778263	0.0025087	0.757541
SNRPN	Father BMI_Female child FCB methylation	-0.000781217	0.000729299	0.289332
SNRPN	Father BMI_Male child FCB methylation	-0.000771691	0.00102354	0.454043
NNAT	Father BMI_Female child FCB methylation	0.00226268	0.00190466	0.24035
NNAT	Father BMI_Male child FCB methylation	-0.00363619	0.0017364	0.0407095
PEG10	Father BMI_Female child FCB methylation	-0.00104639	0.00100704	0.303574
PEG10	Father BMI_Male child FCB methylation	0.00107371	0.000934229	0.255232
H19-IG DMR	Father BMI_Female child FCB methylation	-0.00447743	0.00243015	0.0713427
H19-IG DMR	Father BMI_Male child FCB methylation	0.0024057	0.00262205	0.362822
IGF2 DMR0	Father BMI_Female child FCB methylation	-0.00281564	0.00123417	0.0268177
IGF2 DMR0	Father BMI_Male child FCB methylation	0.000711874	0.001356	0.601668
MEG3-IG DMR	Father BMI_Female child FCB methylation	-0.00124442	0.000881146	0.164599
MEG3-IG DMR	Father BMI_Male child FCB methylation	0.00194675	0.000926394	0.0403743
HIF3A	Father BMI_Female child FCB methylation	-0.000541543	0.00133642	0.686978
HIF3A	Father BMI_Male child FCB methylation	0.00366183	0.00191517	0.0610891
Gene	FCB DNA methylation with mother's BMI	estimate	std.error	p.value
MEST	Mother BMI_Female child FCB methylation	0.000969402	0.00187013	0.606448
MEST	Mother BMI_Male child FCB methylation	0.000215851	0.00216218	0.920836
SNRPN	Mother BMI_Female child FCB methylation	-0.00021599	0.00059606	0.718639
SNRPN	Mother BMI_Male child FCB methylation	-0.000908614	0.000873683	0.302818
NNAT	Mother BMI_Female child FCB methylation	0.000468616	0.00146996	0.751183
NNAT	Mother BMI_Male child FCB methylation	-0.00137704	0.00153463	0.373328
PEG10	Mother BMI_Female child FCB methylation	0.000312676	0.000820532	0.704708
PEG10	Mother BMI_Male child FCB methylation	0.000668916	0.000805607	0.409819
H19-IG DMR	Mother BMI_Female child FCB methylation	-6.75903e-05	0.00203023	0.973574
H19-IG DMR	Mother BMI_Male child FCB methylation	-0.00222771	0.0022873	0.334271
IGF2 DMR0	Mother BMI_Female child FCB methylation	-0.0010536	0.000895817	0.245111
IGF2 DMR0	Mother BMI_Male child FCB methylation	0.000851015	0.000922578	0.360261
MEG3-IG DMR	Mother BMI_Female child FCB methylation	0.000728243	0.000729223	0.323185
MEG3-IG DMR	Mother BMI_Male child FCB methylation	0.000894592	0.000846707	0.295507
HIF3A	Mother BMI_Female child FCB methylation	-0.000645904	0.00107727	0.551393
HIF3A	Mother BMI_Male child FCB methylation	0.00028519	0.00134969	0.833433
